# Supplementary material for: Electroacupuncture for the prevention of postoperative gastrointestinal dysfunction in participants undergoing vascular laparotomy under general anesthesia: a randomized controlled trial
Source: Springer Nature journal article supplement (doi:10.1186/s13020-016-0122-9), 2017-01-16
Supplement: MOESM1 [file 12001264]

## 四川大学华西医院临床试验与生物医学伦理专委会审查批件

2013年 审(105)号

|                |                               |                 |
|----------------|-------------------------------|-----------------|
| 科室(专业): 中西医结合科 | 项目负责人姓名及职称: 李宁 副教授            |                 |
| 项目名称           | 电针对防治血管外科行全麻术后患者胃肠功能紊乱的临床观察研究 |                 |
| 研究方案           | 版本号: 无                        | 版本日期: 2013.9.17 |
| 知情同意书          | 版本号: 第1版                      | 版本日期: 2013.7.16 |

审查意见:

1. 研究者资质符合伦理要求。
2. 研究方案及知情同意书基本符合伦理要求。

审查结果: 同意 作必要修正后同意 作必要修正后再审 不同意 终止或暂停

请遵循我国相关法律、法规和规章(SFDA《药物临床试验质量管理规范》(2003)、《医疗器械临床试验规定》(2004)、WMA《赫尔辛基宣言》和CIOMS《人体生物医学研究国际道德指南》、卫生部《涉及人的生物医学研究伦理审查办法(试行)(2007)》), 遵循伦理委员会批准的方案和知情同意书开展临床试验(研究), 保护受试者的健康与权利。

在试验(研究)过程中, 若变更主要研究者, 对临床研究方案、知情同意书等的任何修改, 请申请人提交修正案审查申请。

发生严重不良事件, 请申请人及时提交严重不良事件报告; 紧急报告之后, 尽快提交详细的严重不良事件随访报告。

请递交年度和定期跟踪审查报告; 当出现任何可能显著影响试验(研究)进行或增加受试者危险的情况时, 请申请人及时向伦理专委会提交书面报告。

试验(研究)纳入了不符合纳入标准或符合排除标准的受试者, 符合中止试验(研究)规定而未让受试者退出试验(研究), 给予错误治疗或剂量, 给予方案禁止的合并用药等没有遵从方案开展研究的情况; 或可能对受试者的权益/健康, 以及研究的科学性造成不良影响等违背伦理原则与规范的情况, 请申办者/监查员/研究者提交违背方案报告。

申请人暂停或提前终止临床试验(研究), 请及时提交暂停/终止试验(研究)报告。完成临床试验(研究), 请申请人提交总结报告。

单位(章): 

主任委员(签名): 

2013年 9月 7日
